# Supplementary material
Source: PubMed Central journal article supplement (PMC2746682)
Supplement: NIHMS130662-supplement-1.pdf [file NIHMS130662-supplement-1.pdf]

# Supplemental Figure 1.

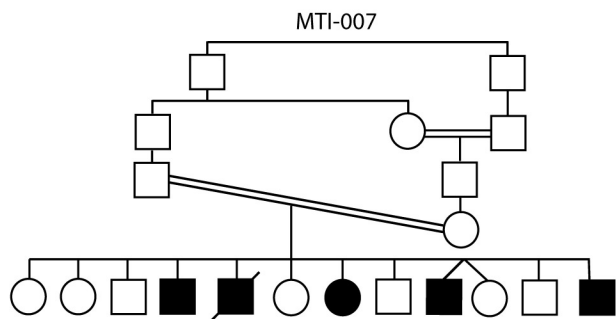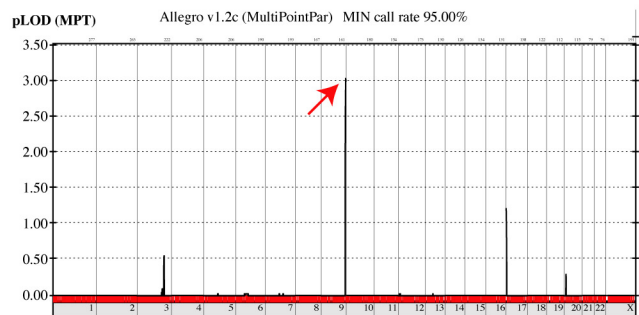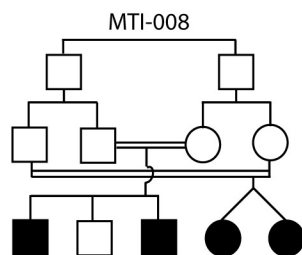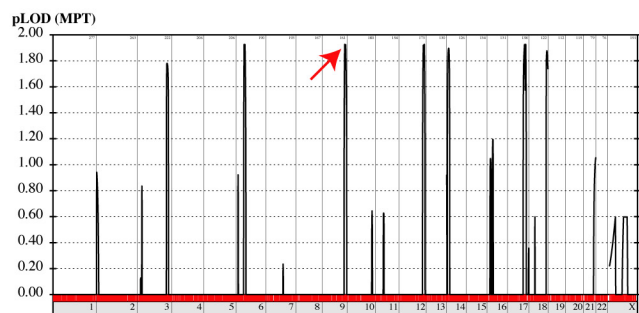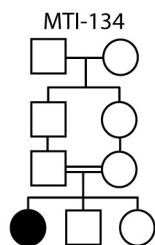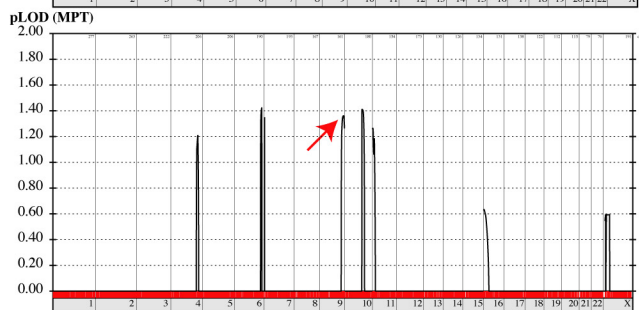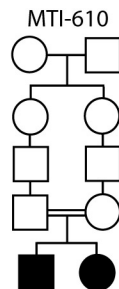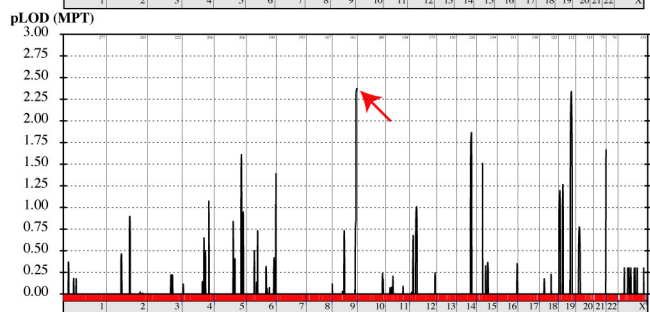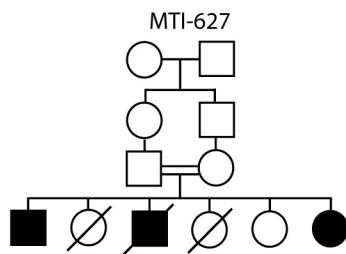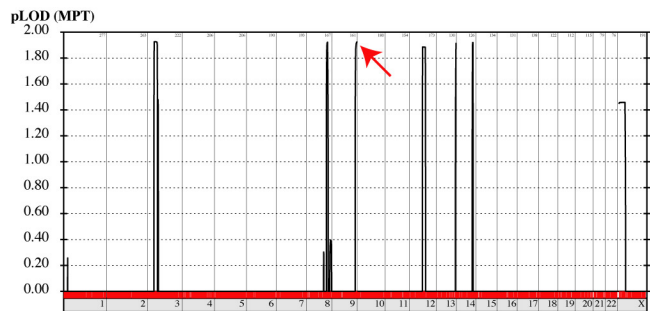

Marker coverage and chromosomes

Supplemental Figure 1. Pedigrees and linkage plots for families used in this study. Left shows pedigrees. Double bar documents consanguinity. Males = square, female = circle, hashed line = deceased. All families have documented consanguinity. Right shows LOD score plots, with chromosome along x-axis, and multipoint plod along y-axis, as calculated by Allegro v1.2c. Note the peak at Chr. 9q term in all families included in this study.

# Supplemental Figure 2.

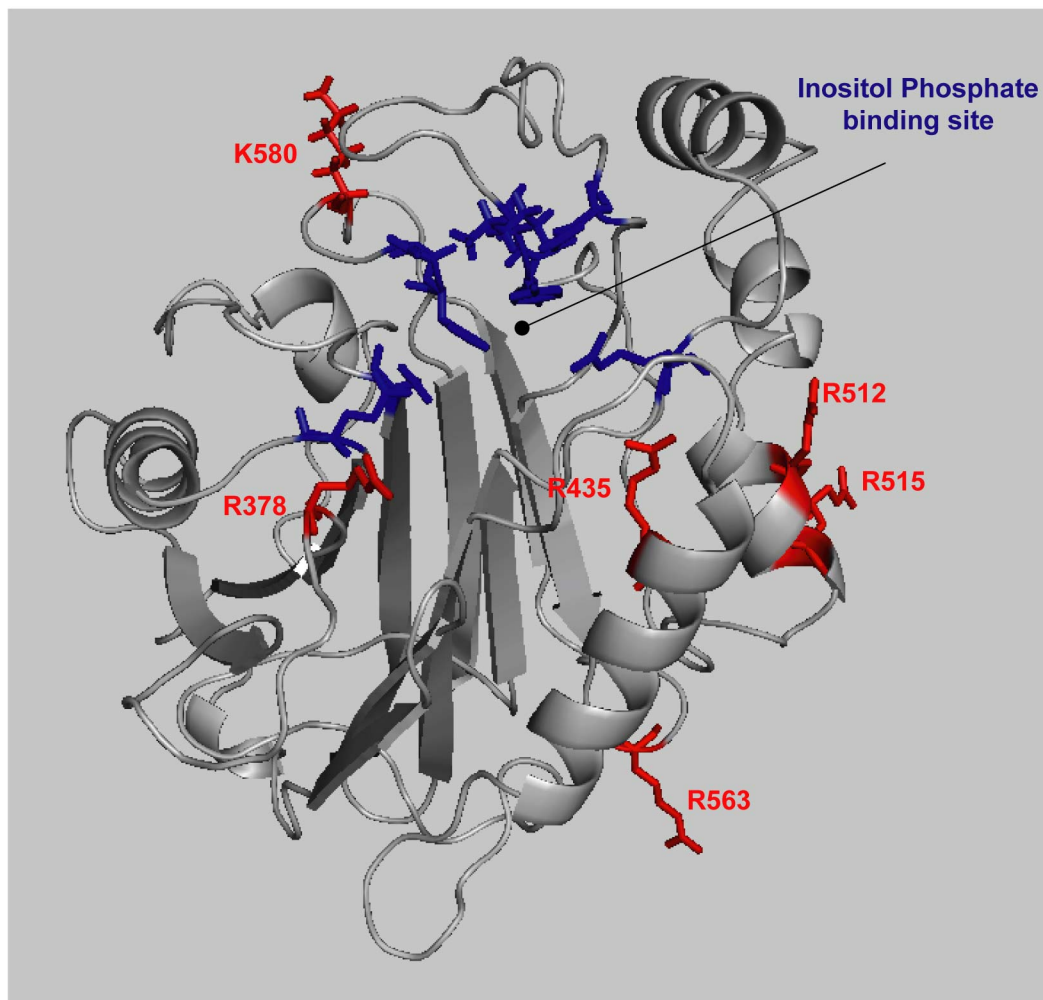

Supplemental Figure 2. Homology modeling of wild-type INPP5E using crystallized synaptojanin 5-phosphatase as a template. The inositol phosphate binding site is shown by black dot, with key residues mediating binding indicated in blue. The location of amino acids mutated in JS patients are indicated in red, and most are located in the face of the binding pocket.

# Supplemental Figure 3.

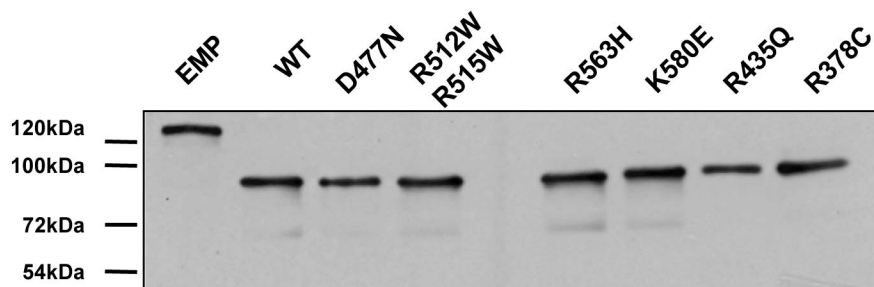

Supplemental Figure 3. Western blot using Myc antibody demonstrating comparable amounts of immunoprecipitated INPP5E for each corresponding patient mutation compared with positive and negative controls, used subsequently for enzymatic assays in Fig. 2.

# Supplemental Figure 4.

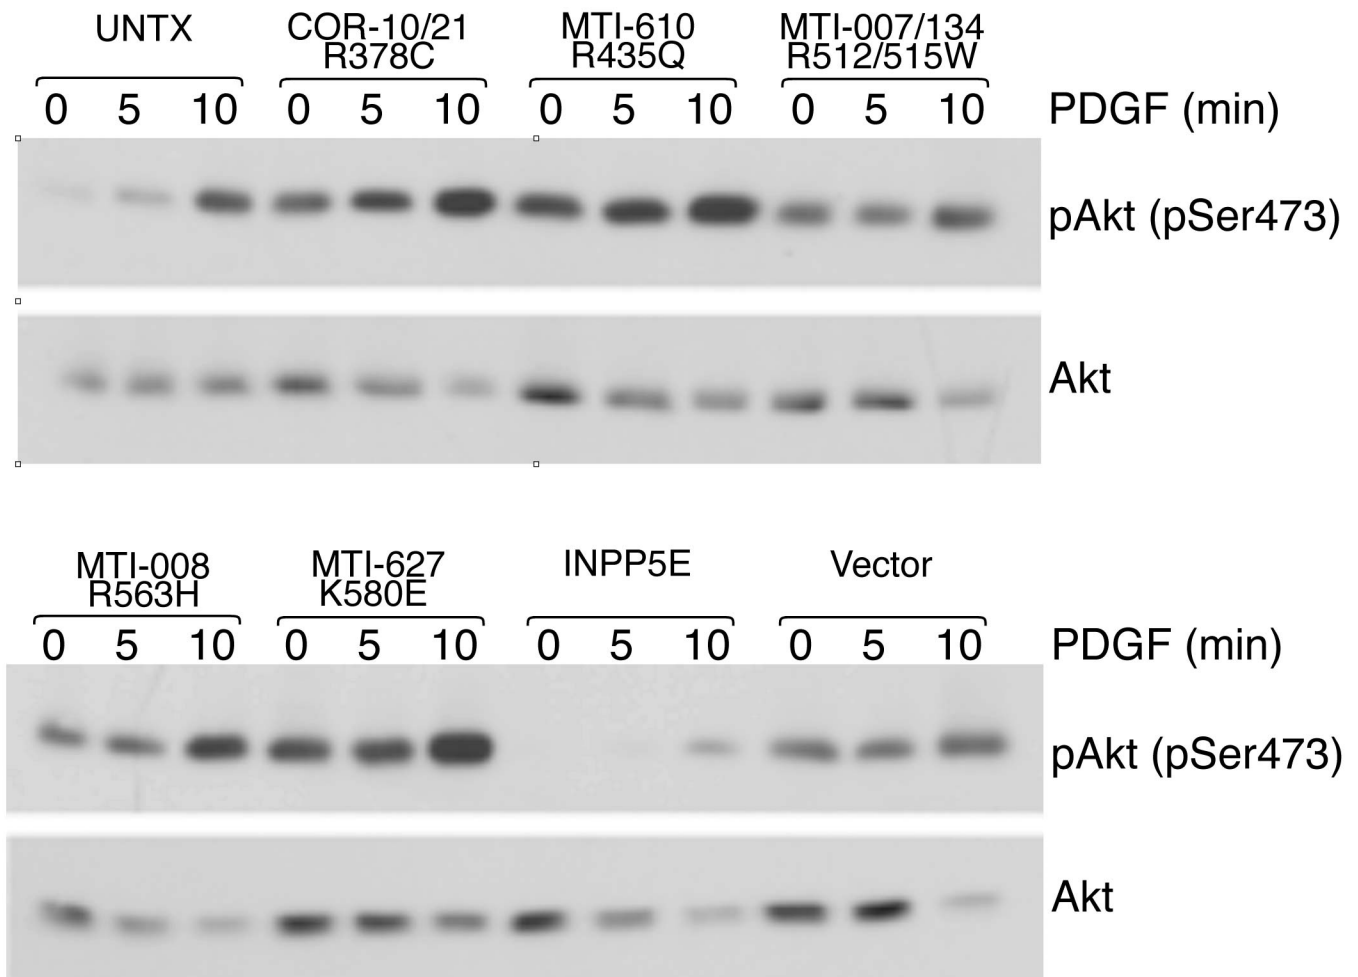

Supplemental Figure 4. INPP5E patient mutations fail to block Akt phosphorylation in response to PDGF stimulation. 293T cells were stably transfected to inducibly overexpress INPP5E cDNAs (untransfected, wildtype INPP5E, empty vector, or patient mutations). Cells were then induced with tetracycline, followed by PDGF stimulation. Total and phospho-Akt levels were assessed at 0, 5 and 10 minutes.

# Supplemental Figure 5.

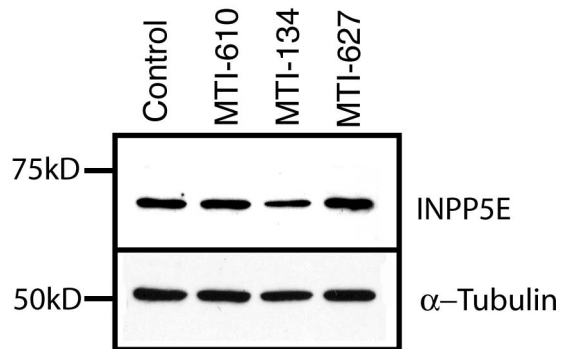

Supplemental Figure 5. Western blot using INPP5E antibody demonstrating comparable amounts of INPP5E expressed in growth-arrested fibroblasts from control vs. three different patients.  $\alpha$ -Tubulin was used as a loading control.

# Supplemental Figure 6.

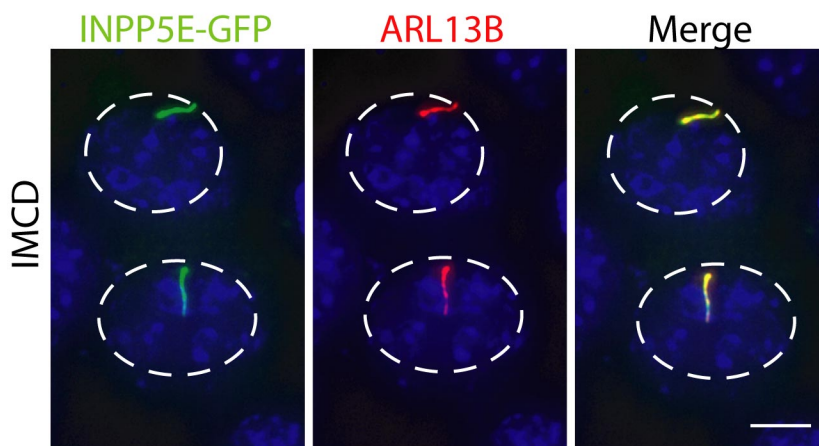

Supplemental Figure 6. Localization of transfected GFP-tagged INPP5E to primary cilia. Intramedullary collecting duct cells (IMCD) were transfected with GFP-tagged INPP5E, then fixed and stained for ARL13B to visualize cilia. ARL13B-positive cilia are also positive for INPP5E. Nuclei are circled, scale bar 5  $\mu$ m.

# Supplemental Figure 7.

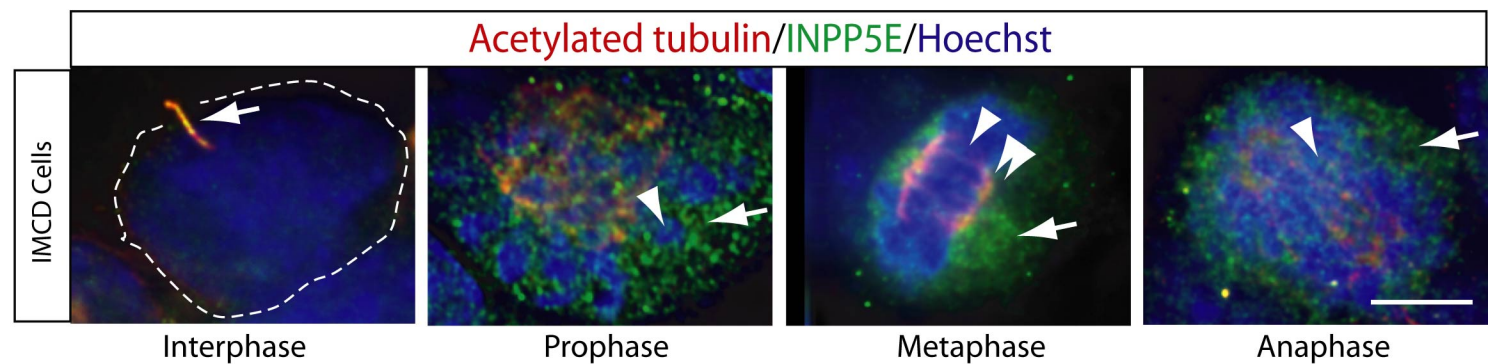

Supplemental Figure 7. INPP5E (green) localization at interphase compared with stages of mitosis in IMCD-3 cells, co-stained for acetylated tubulin (red) and Hoechst nuclei (blue). At interphase, a single cilium is apparent (arrow) and INPP5E shows localization to this site. During stages of mitosis, when the cilium has been reabsorbed, INPP5E shows cytoplasmic localization. Arrows = INPP5E localization. Arrowheads = condensed chromatin. Double arrowhead = spindle microtubules. Scale bar = 5  $\mu$ m.

# Supplemental Figure 8.

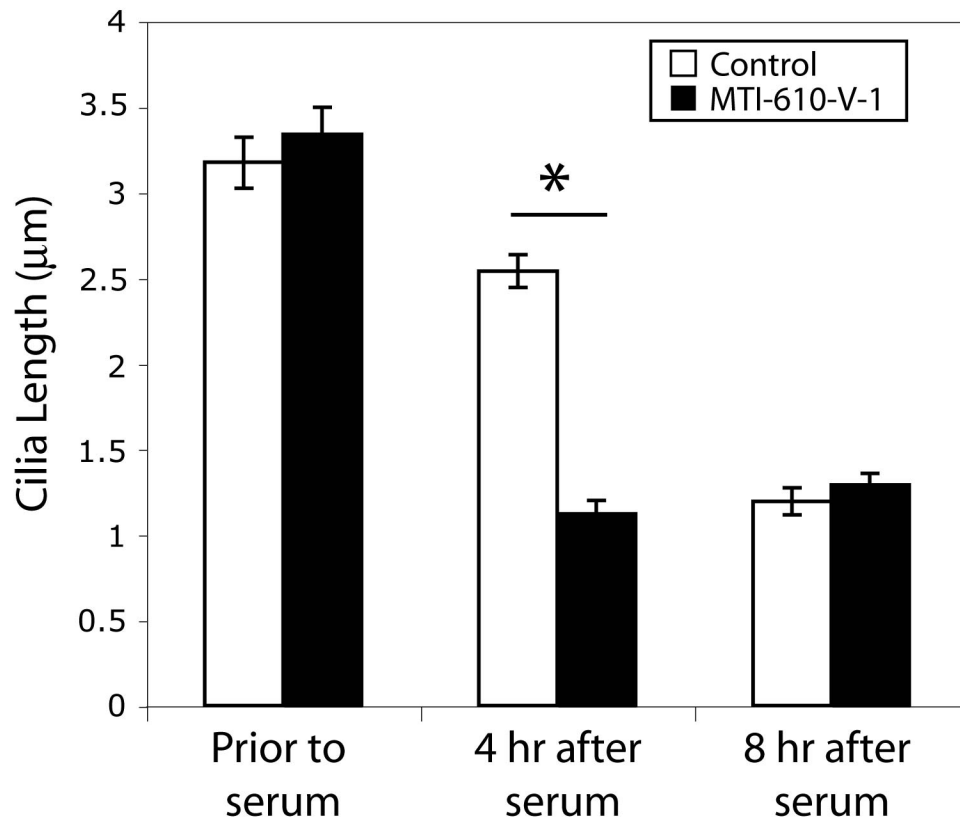

Supplemental Figure 8. Quantification of cilia length in control vs. MTI-610-V-1 primary fibroblasts. Serum was added at time = 0 hrs, and cilia length was assessed from x-y projection images at 0, 4 and 8 hrs. Cilia length was significantly reduced in mutant cells at 4 hrs, suggesting enhanced cilia lability in the absence of functioning INPP5E.



# Supplemental Figure 9.

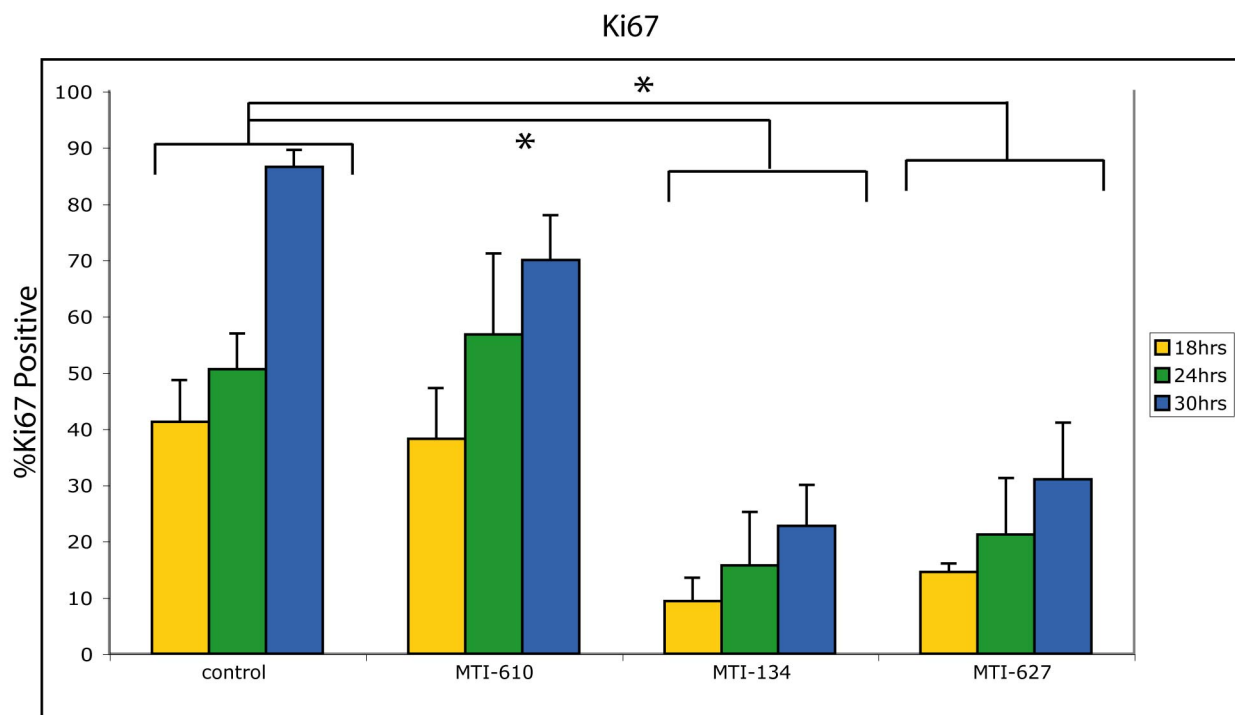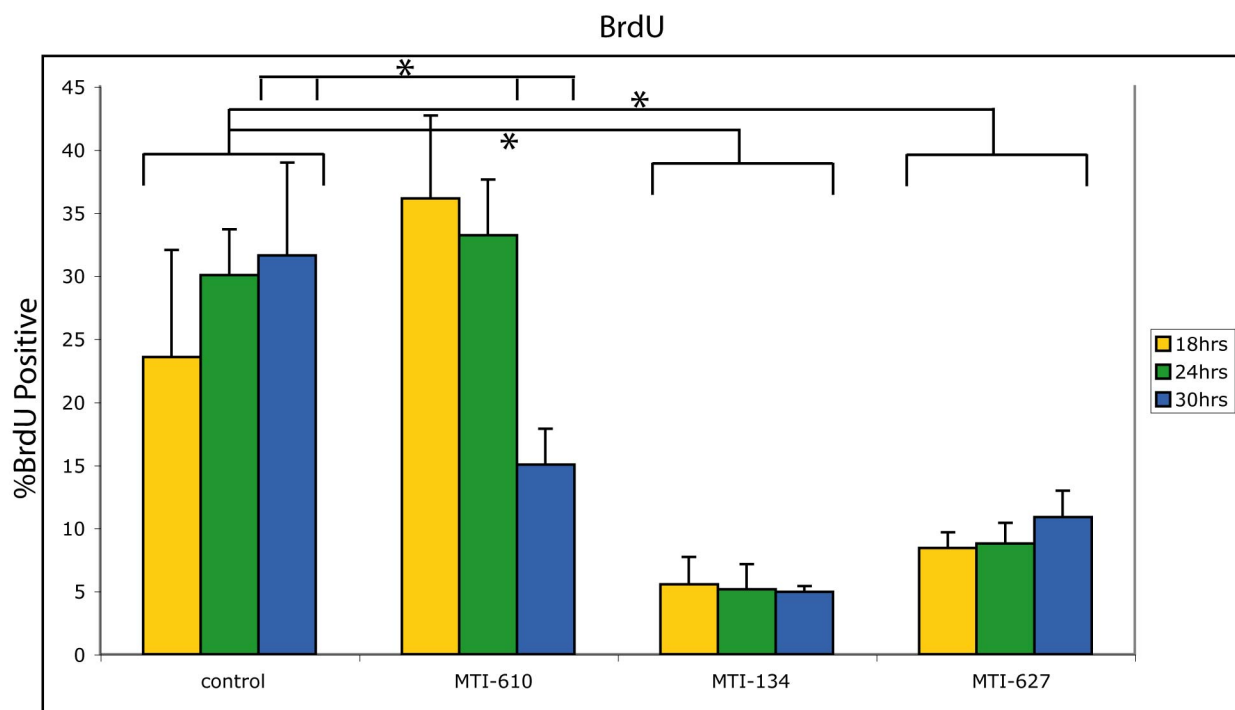

Supplemental Figure 9. Altered cell cycle dynamics in INPP5E-mutant samples. Growth-arrested subconfluent fibroblasts were assessed for cell cycle reentry based upon BrdU incorporation and Ki67 positivity, at various timepoints after 20% serum addition. MTI-134 and MTI-627 were significantly different from control for both parameters at all three timepoints, whereas MTI-610 was different only for BrdU incorporation at 30 hrs. \* represents  $p < 0.05$  paired comparison of one-way ANOVA.

# Supplemental Figure 10.

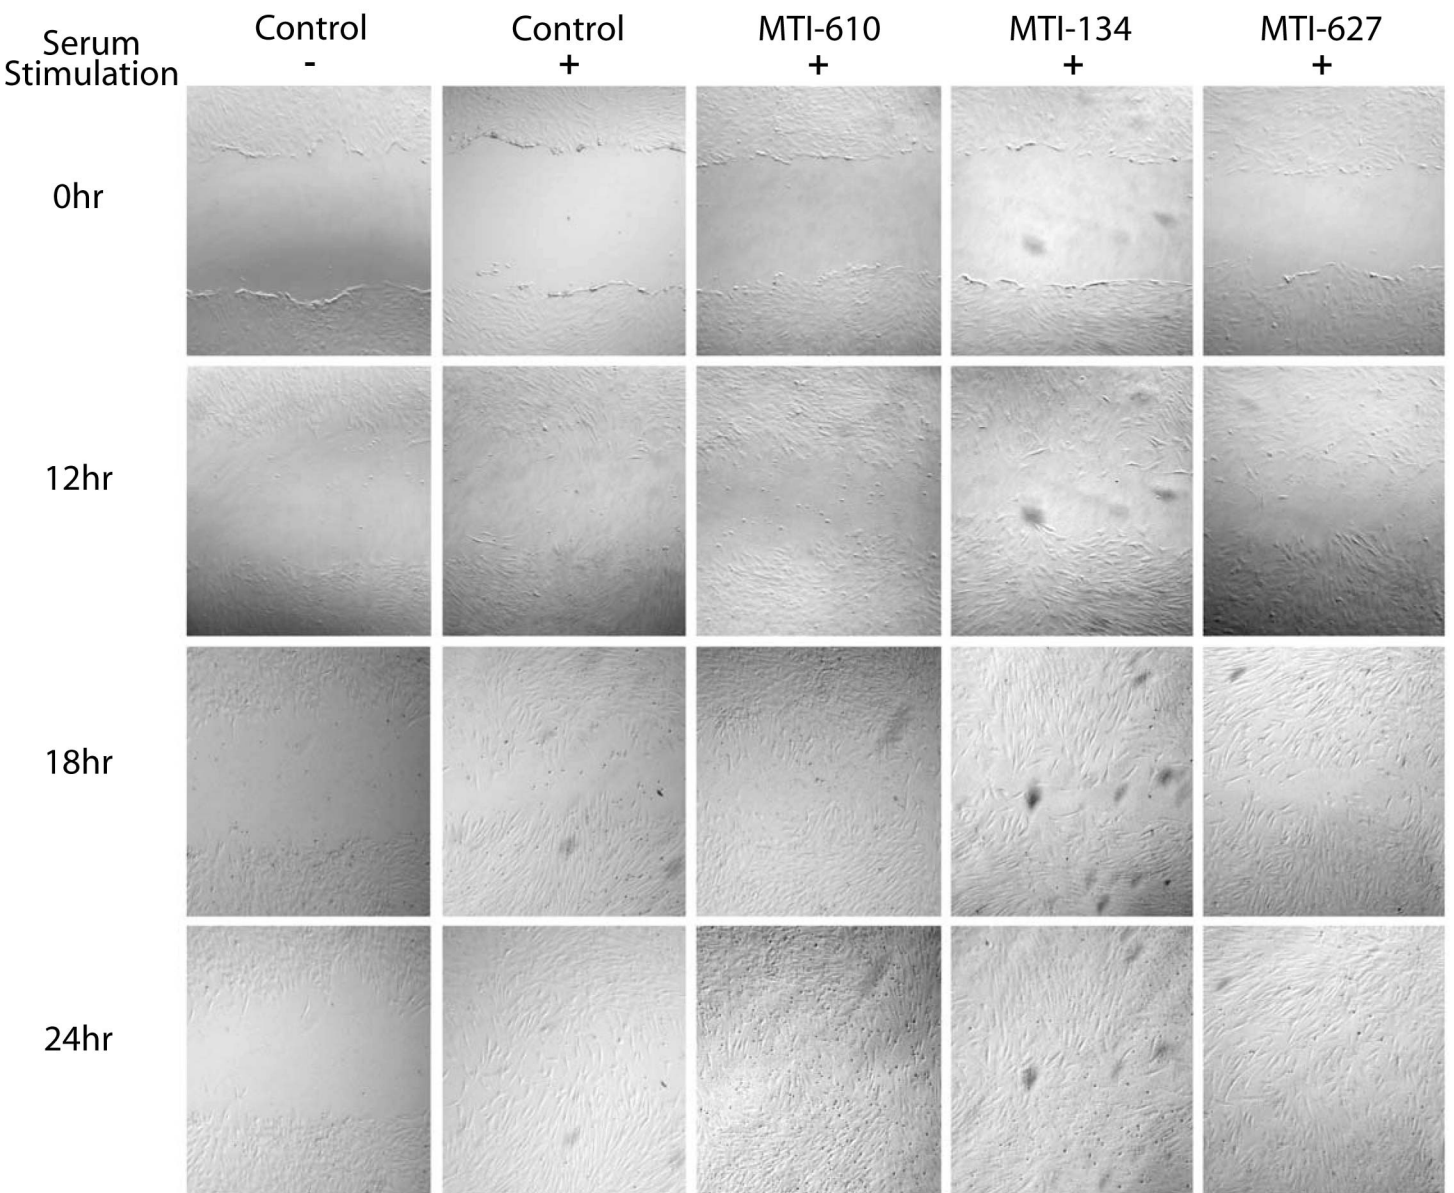

Supplemental Figure 10. Scratch wound assay following serum stimulation in control and patient fibroblast lines. At time 0hr, the wound is similar in all five samples. Without serum, all samples fail to show migration into the wound over 24 hrs (shown only for control), whereas serum addition is associated with appreciable numbers of cells moving into the wounded area. MTI-620, MTI-134 and MTI-627 fibroblasts show healing with comparable dynamics in the presence of serum.

# Supplemental Table 1.

| Clinical findings of patients with <i>INPP5E</i> mutations |                                        |                                |                                        |                                                       |                                               |                           |                                                |
|------------------------------------------------------------|----------------------------------------|--------------------------------|----------------------------------------|-------------------------------------------------------|-----------------------------------------------|---------------------------|------------------------------------------------|
| Demographic information                                    |                                        |                                |                                        |                                                       |                                               |                           |                                                |
| Family ID                                                  | MTI-007                                | MTI-008                        | MTI-134                                | MTI-610                                               | MTI-627                                       | COR-10                    | COR-21                                         |
| Country of origin                                          | UAE                                    | UAE                            | UAE                                    | Turkish                                               | Egyptian                                      | Italian                   | Italian                                        |
| Patient                                                    | Five affecteds (1 died)                | Four affecteds                 | One affected                           | Two affecteds                                         | Three affecteds (1 died)                      | Two affecteds             | One affected                                   |
| Death                                                      | Y                                      | N                              | N                                      | N                                                     | Y                                             | N                         | N                                              |
| Documented consanguinity                                   | Y                                      | Y                              | Y                                      | Y                                                     | Y                                             | Y                         | Y                                              |
| Genetic results                                            |                                        |                                |                                        |                                                       |                                               |                           |                                                |
| Nucleotide change; amino acid change                       | c.1537C>T; p.R512W, c.1546C>T; p.R515W | c.1691G>A; p.R563H             | c.1537C>T; p.R512W, c.1546C>T; p.R515W | c.1305G>A; p.R435Q                                    | c.1738A>G; p.K580E                            | c.1132C>T; p.R378C        | c.1132C>T; p.R378C                             |
| Amino acid alteration                                      | Strongly basic to neutral              | Strongly basic to weakly basic | Strongly basic to neutral              | Strongly basic to neutral                             | Basic to acidic                               | Strongly basic to neutral | Strongly basic to neutral                      |
| Exon                                                       | 7                                      | 9                              | 7                                      | 6                                                     | 9                                             | 4                         | 4                                              |
| Mutation type                                              | Homozygous                             | Homozygous                     | Homozygous                             | Homozygous                                            | Homozygous                                    | Homozygous                | Homozygous                                     |
| Neurological signs                                         |                                        |                                |                                        |                                                       |                                               |                           |                                                |
| Hypotonia/ataxia                                           | Y                                      | Y                              | Y                                      | Y                                                     | Y                                             | Y                         | Y                                              |
| Psychomotor delay                                          | Y                                      | Y                              | Y                                      | Y                                                     | Y                                             | Y                         | Y                                              |
| Mental retardation                                         | Y                                      | Y                              | Y                                      | Y                                                     | Y                                             | Y                         | ?                                              |
| OMA                                                        | Y                                      | Y                              | Y                                      | Y                                                     | Y                                             | Y                         | Y                                              |
| Breathing abnormalities                                    | N                                      | N                              | Y                                      | N                                                     | N                                             | N                         | N                                              |
| Ocular signs                                               |                                        |                                |                                        |                                                       |                                               |                           |                                                |
| Retinopathy                                                | Y                                      | Y, Pale optic disc             | N                                      | N                                                     | N                                             | Y                         | Y                                              |
| Coloboma                                                   | N                                      | N                              | N                                      | N                                                     | N                                             | N                         | N                                              |
| Renal signs                                                |                                        |                                |                                        |                                                       |                                               |                           |                                                |
| NPHP/UCD                                                   | N                                      | N                              | N                                      |                                                       | N                                             | N                         | N                                              |
| Kidney ultrasound                                          | Negative                               | Negative                       | Negative                               | Both with bilateral increased echogenicity with cysts | Negative                                      | Negative                  | Negative                                       |
| Other organs                                               |                                        |                                |                                        |                                                       |                                               |                           |                                                |
| Liver abnormalities                                        | N                                      | N                              | N                                      | N                                                     | Both with elevated transaminases and fibrosis | N                         | Elevated transaminases with fibrosis/cirrhosis |
| Polydactyly                                                | N                                      | N                              | N                                      | N                                                     | N                                             | N                         | N                                              |
| MRI reading                                                |                                        |                                |                                        |                                                       |                                               |                           |                                                |
| MTS                                                        | Y                                      | Y                              | Y                                      | Y                                                     | Y                                             | Y                         | Y                                              |
| Other abnormalities                                        | -                                      | Plagiocephaly                  | -                                      | Microcephaly                                          |                                               |                           |                                                |

Legend: ERG - electroretinogram, MTS - Molar tooth sign, NPHP - nephronophthisis, OMA - Oculomotor apraxia, UCD - urinary concentrating defect.

# Supplemental Table 2.

| Mutant haplotype at 9q34.3 |           |           |           |           |           |
|----------------------------|-----------|-----------|-----------|-----------|-----------|
| SNP                        | Families  |           |           |           |           |
|                            | MTI-007   | MTI-008   | MTI-134   | MTI-610   | MTI-627   |
| rs1220789                  |           |           | <b>AB</b> |           |           |
| rs1054879                  |           |           | <b>B</b>  |           |           |
| rs818053                   |           |           | <b>B</b>  |           |           |
| rs818052                   |           |           | <b>A</b>  |           |           |
| rs735107                   |           |           | <b>A</b>  |           |           |
| rs10901140                 |           |           | <b>A</b>  |           |           |
| rs565325                   |           |           | <b>B</b>  |           |           |
| rs456396                   |           |           | <b>B</b>  |           |           |
| rs215156                   |           |           | <b>B</b>  |           |           |
| rs886017                   |           |           | <b>A</b>  | <b>AB</b> |           |
| rs12335                    |           |           | <b>A</b>  | <b>A</b>  |           |
| rs1611122                  |           |           | <b>B</b>  | <b>A</b>  | <b>AB</b> |
| rs886112                   |           |           | <b>B</b>  | <b>A</b>  | <b>B</b>  |
| rs7023064                  |           |           | <b>B</b>  | <b>B</b>  | <b>B</b>  |
| rs877954                   |           |           | <b>B</b>  | <b>A</b>  | <b>A</b>  |
| rs3132332                  | <b>AB</b> |           | <b>B</b>  | <b>A</b>  | <b>A</b>  |
| rs2989726                  | <b>B</b>  | <b>AB</b> | <b>B</b>  | <b>A</b>  | <b>B</b>  |
| rs4641145                  | <b>B</b>  | <b>A</b>  | <b>B</b>  | <b>B</b>  | <b>B</b>  |
| rs914400                   | <b>B</b>  | <b>B</b>  | <b>B</b>  | <b>A</b>  | <b>B</b>  |
| rs705670                   | <b>A</b>  | <b>A</b>  | <b>A</b>  | <b>A</b>  | <b>A</b>  |
| rs710411                   | <b>A</b>  | <b>AB</b> | <b>A</b>  | <b>A</b>  | <b>A</b>  |
| rs945383                   | <b>B</b>  | <b>AB</b> | <b>B</b>  | <b>B</b>  | <b>B</b>  |
| rs908831                   | <b>A</b>  | <b>AB</b> | <b>A</b>  | <b>A</b>  | <b>A</b>  |
| rs1018330                  | <b>A</b>  | <b>AB</b> | <b>A</b>  | <b>A</b>  | <b>A</b>  |
| rs7028989                  | <b>B</b>  | <b>B</b>  | <b>B</b>  | <b>B</b>  | <b>B</b>  |
| rs7860423                  | <b>B</b>  | <b>B</b>  | <b>B</b>  | <b>B</b>  | <b>B</b>  |
| rs766374                   | <b>A</b>  | <b>AB</b> | <b>A</b>  | <b>A</b>  | <b>A</b>  |

Supplemental Table 2. Genotypes for affected individuals within JBTS1-linked families surrounding the candidate interval. Red = recombination events from each family linking to the candidate interval. INPP5E is located between rs705670 and rs710411 (yellow). A block of heterozygosity was detected within the candidate interval in family MTI-008, but it was not possible to detect which of the two remaining linked blocks contained the gene of interest.

# Supplemental Table 3.

| Marker     | Gene          | Base Position      | (UCSC | Screening            | Families Screened    |
|------------|---------------|--------------------|-------|----------------------|----------------------|
|            |               | March 2006 Freeze) |       | Method               |                      |
| D9S1826    | RXRA          | 136,438,249        |       | Seq                  | 007, 008             |
|            | COL5A1        | 136,673,473        |       | SSCP and Seq         | 007, 008             |
|            | FCN2          | 136,912,479        |       |                      |                      |
|            | FCN1          | 136,941,255        |       | SSCP                 | 007, 008             |
|            | OLFM1         | 137,106,992        |       | Seq                  | 007, 008, 134, COR10 |
|            | C9orf62       | 137,374,916        |       | SSCP                 | 007, 008             |
|            | KIAA0649      | 137,511,469        |       | SSCP and Seq         | 007, 008             |
|            | C9orf116      | 137,526,847        |       |                      |                      |
|            | MRPS2         | 137,532,375        |       | SSCP and Seq         | 007, 008             |
|            | LCN1          | 137,553,107        |       | Seq                  | 007, 008             |
|            | OBP2A         | 137,577,806        |       | Seq                  | 007, 008             |
|            | PAEP          | 137,593,425        |       | Seq                  | 007, 008             |
|            | GLT6D1        | 137,655,323        |       | Seq                  | 007, 008, 134, COR10 |
|            | LCN9          | 137,694,989        |       |                      |                      |
|            | SOHLH1        | 137,725,076        |       |                      |                      |
|            | KCNT1         | 137,733,859        |       | SSCP                 | 007, 008             |
|            | CAMSAP1       | 137,841,248        |       | Seq                  | 007, 008, 134, COR10 |
|            | UBADC1        | 137,956,367        |       | Seq                  | 007, 008, 134, COR10 |
|            | BTBD14A       | 138,043,024        |       | SSCP                 |                      |
|            | AK023162      | 138,146,248        |       |                      |                      |
|            | LHX3          | 138,227,917        |       | SSCP and Seq         | 007, 008             |
|            | QSCN6L1       | 138,238,004        |       | Seq                  | 007, 008, 134, COR10 |
|            | GPSM1         | 138,341,753        |       | Seq                  | 007, 008, 134, COR10 |
|            | LOC728489     | 138,376,173        |       | Seq                  | 007, 008, 134, COR10 |
|            | CARD9         | 138,377,262        |       | SSCP and Seq         | 007, 008, 134, COR10 |
|            | SNAPC4        | 138,389,850        |       | Seq                  | 007, 008, 134, COR10 |
|            | SDCCAG3       | 138,416,195        |       | Seq                  | 007, 008, 134, COR10 |
|            | PMPCA         | 138,421,822        |       | Seq                  | 007, 008, 134, COR10 |
|            | <b>INPP5E</b> | <b>138,442,893</b> |       |                      |                      |
|            | KIAA0310      | 138,454,369        |       | Seq                  | 007, 008, 134, COR10 |
|            | C9orf163      | 138,497,768        |       | Seq                  | 007, 008, 134, COR10 |
|            | NOTCH1        | 138,508,717        |       | SSCP and Seq         | 007, 008, 134, COR10 |
|            | EGFL7         | 138,673,129        |       | SSCP and Seq         | 007, 008             |
|            | AGPAT2        | 138,687,416        |       | SSCP and Seq         | 007, 008             |
|            | FAM69B        | 138,726,851        |       |                      |                      |
|            | AK054908      | 138,735,639        |       |                      |                      |
| LCN6/LCN10 | 138,752,440   |                    |       |                      |                      |
| TMEM141    | 138,805,628   |                    |       |                      |                      |
| KIAA1984   | 138,810,623   |                    | SSCP  | 007, 008             |                      |
| pp8875     | 138,822,013   |                    | SSCP  | 007, 008             |                      |
| LOC389813  | 138,858,688   |                    |       |                      |                      |
| PHPT1      | 138,862,255   |                    | SSCP  | 007, 008             |                      |
| MAMDC4     | 138,866,640   |                    |       |                      |                      |
| EDF1       | 138,876,392   |                    | SSCP  | 007, 008             |                      |
| TRAF2      | 138,900,786   |                    | SSCP  | 007, 008             |                      |
| FBXW5      | 138,954,708   |                    | Seq   | 007, 008, 134, COR10 |                      |

Supplemental Table 3. Candidate genes within the JBTS1 locus, delineated by the flanking markers D9S1826 and D9S1838. Base position indicated by UCSC Genome Browser March 2006 freeze. Screening method (SSCP vs. sequence vs. both) for each gene screened is indicated. Families used in the screening are indicated in the last column.

# Supplemental Table 3 (continued).

| Marker | Gene         | Base Position      | (UCSC | Screening    | Families Screened    |
|--------|--------------|--------------------|-------|--------------|----------------------|
|        |              | March 2006 Freeze) |       | Method       |                      |
|        | C8G          | 138,959,534        |       | SSCP and Seq | 007, 008             |
|        | LCN12        | 138,966,593        |       | SSCP and Seq | 007, 008             |
|        | PTGDS        | 138,990,822        |       | SSCP and Seq | 007, 008             |
|        | FLJ45224     | 138,996,177        |       |              |                      |
|        | C9orf142     | 139,006,691        |       |              |                      |
|        | CLIC3        | 139,008,881        |       | SSCP         | 007, 008             |
|        | ABCA2        | 139,021,507        |       | SSCP and Seq | 007, 008             |
|        | C9orf139     | 139,041,737        |       |              |                      |
|        | FUT7         | 139,044,447        |       | SSCP and Seq | 007, 008             |
|        | NPDC1        | 139,051,882        |       | SSCP and Seq | 007, 008             |
|        | ENTPD2       | 139,062,374        |       | SSCP and Seq | 007, 008             |
|        | C9orf140     | 139,076,595        |       |              |                      |
|        | DKFZp762l052 | 139,092,017        |       |              |                      |
|        | UNQ747       | 139,101,200        |       | SSCP and Seq | 007, 008             |
|        | DPP7         | 139,124,813        |       |              |                      |
|        | GRIN1        | 139,153,430        |       |              |                      |
|        | LOC389816    | 139,183,033        |       |              |                      |
|        | ANAPC2       | 139,189,057        |       | Seq          | 007, 008, 134, COR10 |
|        | SSNA1        | 139,202,954        |       |              |                      |
|        | C9orf75      | 139,205,890        |       |              |                      |
|        | MGC14327     | 139,218,356        |       |              |                      |
|        | NDOR1        | 139,220,004        |       | Seq          | 007, 008, 134, COR10 |
|        | RNF208       | 139,234,528        |       |              |                      |
|        | MGC59937     | 139,239,465        |       | Seq          |                      |
|        | SLC34A3      | 139,245,030        |       | Seq          | 007, 008, 134, COR10 |
|        | TUBB2C       | 139,255,532        |       | Seq          | 007, 008, 134, COR10 |
|        | LOC401565    | 139,257,858        |       |              |                      |
|        | LOC441476    | 139,265,551        |       |              |                      |
|        | COBRA1       | 139,269,768        |       | Seq          | 007, 008, 134, COR10 |
|        | C9orf167     | 139,292,101        |       | Seq          |                      |
|        | MGC61598     | 139,314,755        |       |              |                      |
|        | FLJ20433     | 139,321,178        |       | Seq          | 007, 008, 134, COR10 |
|        | NOXA1        | 139,437,668        |       | Seq          | 007, 008, 134, COR10 |
|        | ENTPD8       | 139,448,637        |       | Seq          | 007, 008, 134, COR10 |
|        | NELF         | 139,462,498        |       | Seq          | 007, 008, 134, COR10 |
|        | PNPLA7       | 139,474,226        |       |              |                      |
|        | MRPL41       | 139,566,165        |       |              |                      |
|        | WDR85        | 139,569,182        |       |              |                      |
|        | ZMYND19      | 139,596,352        |       | SSCP and Seq | 007, 008             |
|        | ARRDC1       | 139,619,917        |       |              |                      |
|        | C9orf37      | 139,629,610        |       | SSCP and Seq | 007, 008             |
|        | EHMT1        | 139,633,265        |       | SSCP and Seq | 007, 008             |
